# Supplementary material for: Biodegradable Nanofiber/Metal–Organic Framework/Cotton Air Filtration Membranes Enabling Simultaneous Removal of Toxic Gases and Particulate Matter
Source: MDPI journal article supplement (doi:10.3390/polym15193965), 2023-09-30
Supplement: s1 [file s1]

## Supporting Information

# Biodegradable Nanofiber/Metal Organic Framework/Cotton Air Filtration Membranes Enabling Simultaneous Removal of Toxic Gases and Particulate Matter

Sujin Ryu <sup>1,†</sup>, Doyeon Kim <sup>1,2,†</sup>, Hyewon Lee <sup>1</sup>, Yoonjin Kim <sup>1</sup>, Youngbok Lee <sup>2,3,4</sup>, Myungwoong Kim <sup>5,\*</sup>, Heedong Lee <sup>1,\*</sup> and Hoik Lee <sup>1,2,\*</sup>

<sup>1</sup> Advanced Textile R&D Department, Research Institute of Convergence Technology, Korea Institute of Industrial Technology (KITECH), 143 Hangeulro, Sangnok-gu, Ansan 15588, Republic of Korea; sjryu@kitech.re.kr (S.R.); dobbie@kitech.re.kr (D.K.)

<sup>2</sup> HYU-KITECH Joint Department, Hanyang University, Ansan 15588, Republic of Korea; yblee@hanyang.ac.kr

<sup>3</sup> Department of Applied Chemistry, Hanyang University, Ansan 15588, Republic of Korea

<sup>4</sup> Department of Chemical and Molecular Engineering, Center for Bionano Intelligence Education and Research, Hanyang University, Ansan 15588, Republic of Korea

<sup>5</sup> Department of Chemistry and Chemical Engineering, Inha University, Incheon 22212, Republic of Korea

\* Correspondence: mkim233@inha.ac.kr (M.K.); lhd0121@kitech.re.kr (H.L.); hoik@kitech.re.kr (H.L.)

† These authors contributed equally to this work.

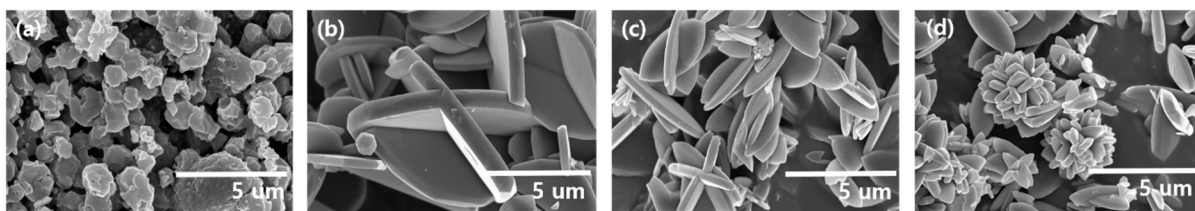

**Figure S1.** SEM images showing the morphology of the prepared ZIF-8 particles with different  $[\text{ligand}]/[\text{Zn}^{2+}]$  of (a) 2.0, (b) 4.0, (c) 6.0, and (d) 8.0.
